# Supplementary figures and images for: A Preliminary Study of the Effects of Venous Drainage Position on Arterial Blood Supply and Venous Return within the Conjoined Flap
Source: PubMed Central journal article supplement — Plast Reconstr Surg. 2019 Jan 29;143(2):322–8. doi: 10.1097/PRS.0000000000005256 (PMC6358195; doi:10.1097/prs.0000000000005256), 2019-01-29

# Case #1

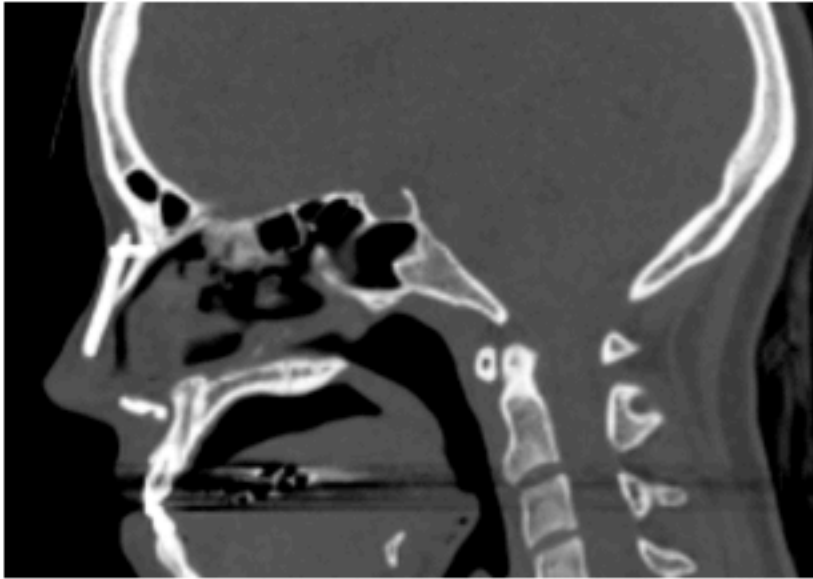

CT Scan at 1 year

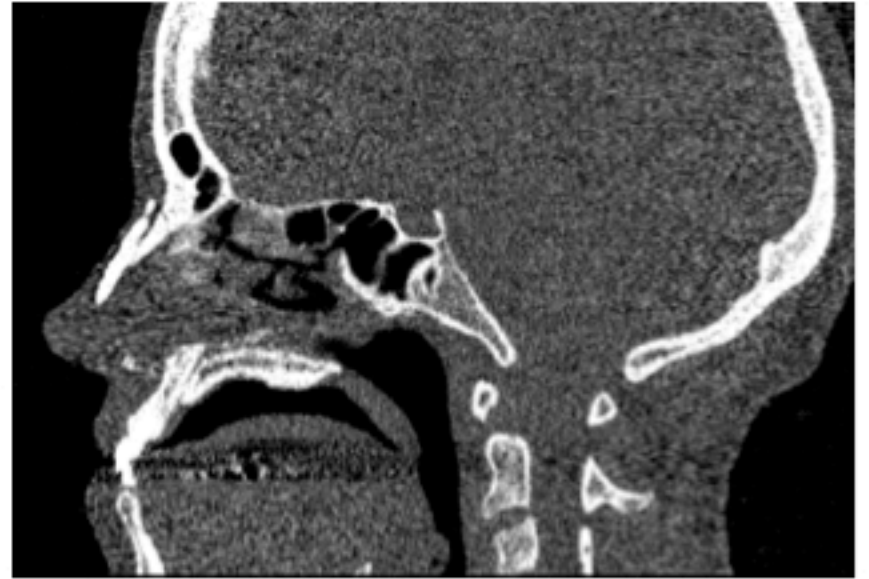

CT Scan at 8 years

Supplement: prs-143-322e-s001.pdf [file prs-143-322e-s001.pdf]
